# Supplementary material
Source: PubMed Central journal article supplement (PMC5373341)
Supplement: pnas.1615372114.sapp.pdf [file pnas.1615372114.sapp.pdf]

# **Novel combinatorial screening identifies neurotrophic factors for selective classes of motor neurons**

**Sébastien Schaller, Dorothée Buttigieg, Alysson Alory, Arnaud Jacquier, Marc Barad, Mark Merchant, David Gentien, Pierre de la Grange and Georg Haase**

## **Supporting Information (SI) Appendix**

Supplemental Figure S1. High speed FACS-isolation of motor neurons

Supplemental Figure S2. Biological activity of neurotrophic factors on motor neuron survival

Supplemental Figure S3. Screening NTF combinations

Supplemental Figure S4. Gene expression profiles of LMC/PGC and MMC motor neurons

Supplemental Figure S5. NTF survival responses of LMC/PGC and MMC motor neurons

Supplemental Figure S6. GFR $\alpha$ 3-mediated Artemin survival signaling

Supplemental Materials and Methods

Table 1. Antibodies used in immunohistochemistry

Table 2. Antibodies used in flow cytometry

Table 3. Antibodies used in immunoblots

Table 4. Neurotrophic factors

Table 5. Pharmacological inhibitors

Table 6. Antisense probes used for in situ hybridization

Supplemental References

Supplemental Fig. S1  
Schaller et al.

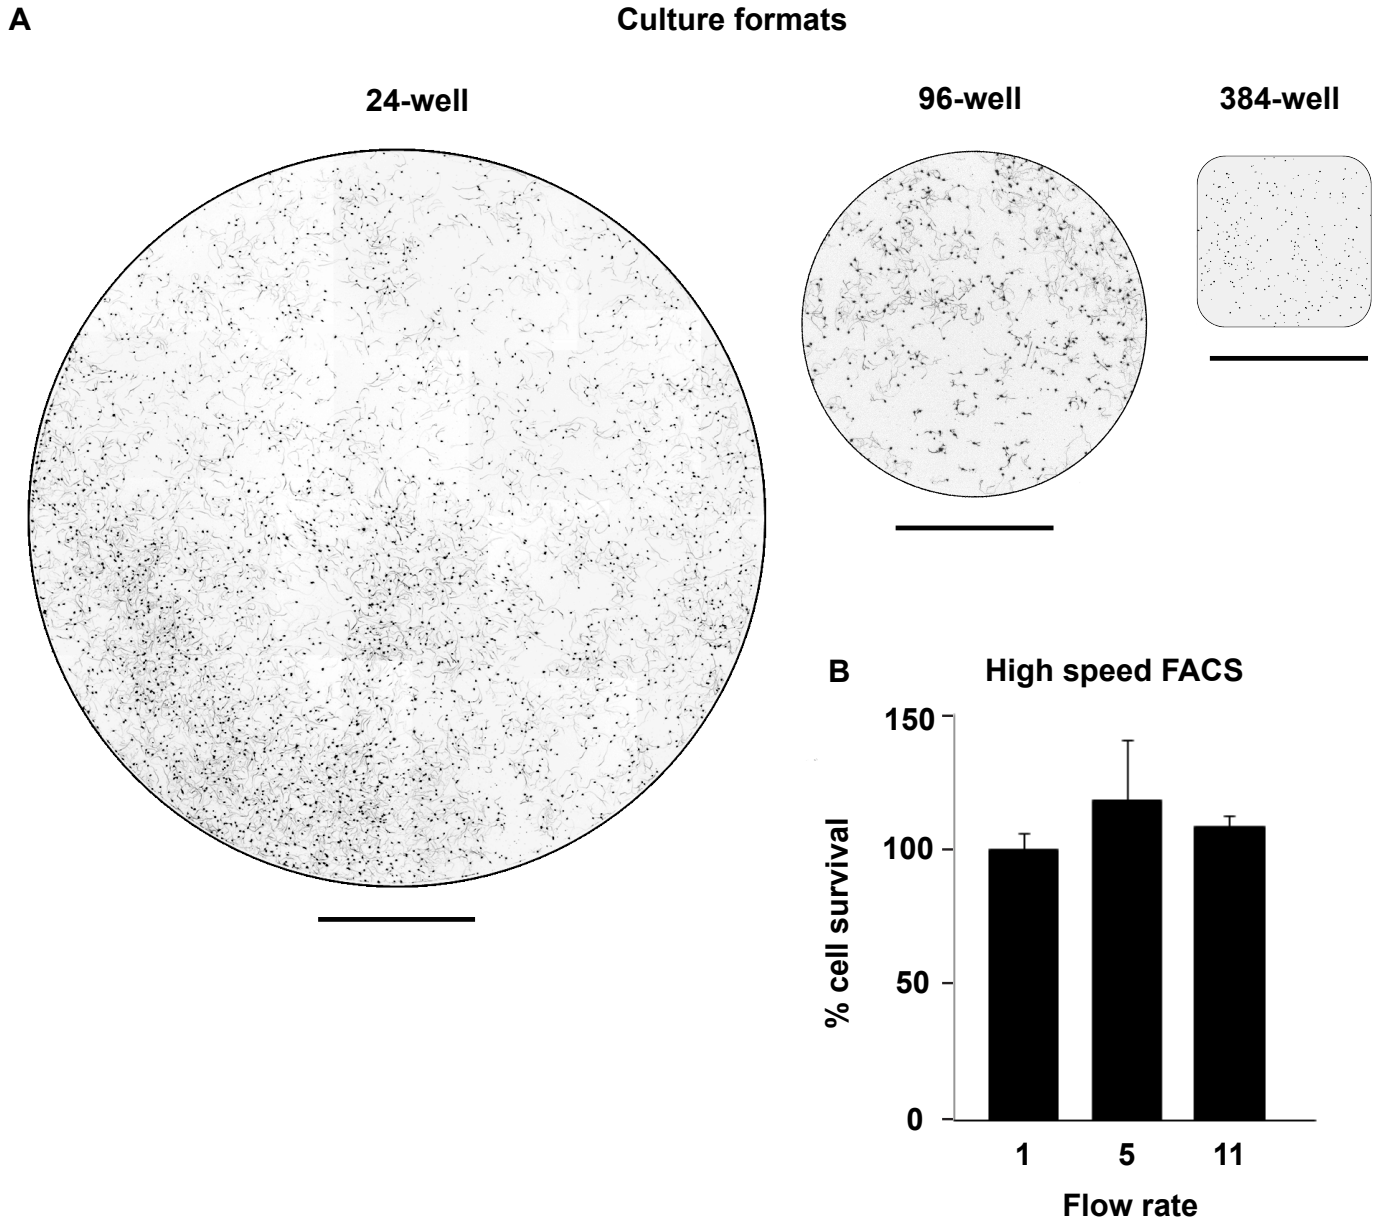

**Supplemental Figure S1. High speed FACS-isolation of motor neurons.**

**A.** Images of FACS-isolated motor neurons after 3 DIV culture. Cells are seeded on 24-well plates fitted with 14 mm coverslips (10,000 cells per well), 96-well plates (1,500 cells per well) or 384-well plates (500 cells per well). Scale bar 3 mm.

**B.** High speed FACS. Motor neurons are isolated at flow rates 1, 5 and 11 corresponding respectively to 14.3, 48.4 and 104 ml/min. Cell survival (mean  $\pm$  sd) at three days in vitro is indistinguishable after FACS at high flow rate (5, 11) or low flow rate (1). Shown is one out of three representative cultures each done in the presence of 12 NTFs. Differences are not significant by Kruskal Wallis test.

**A Biological activity of NTFs**

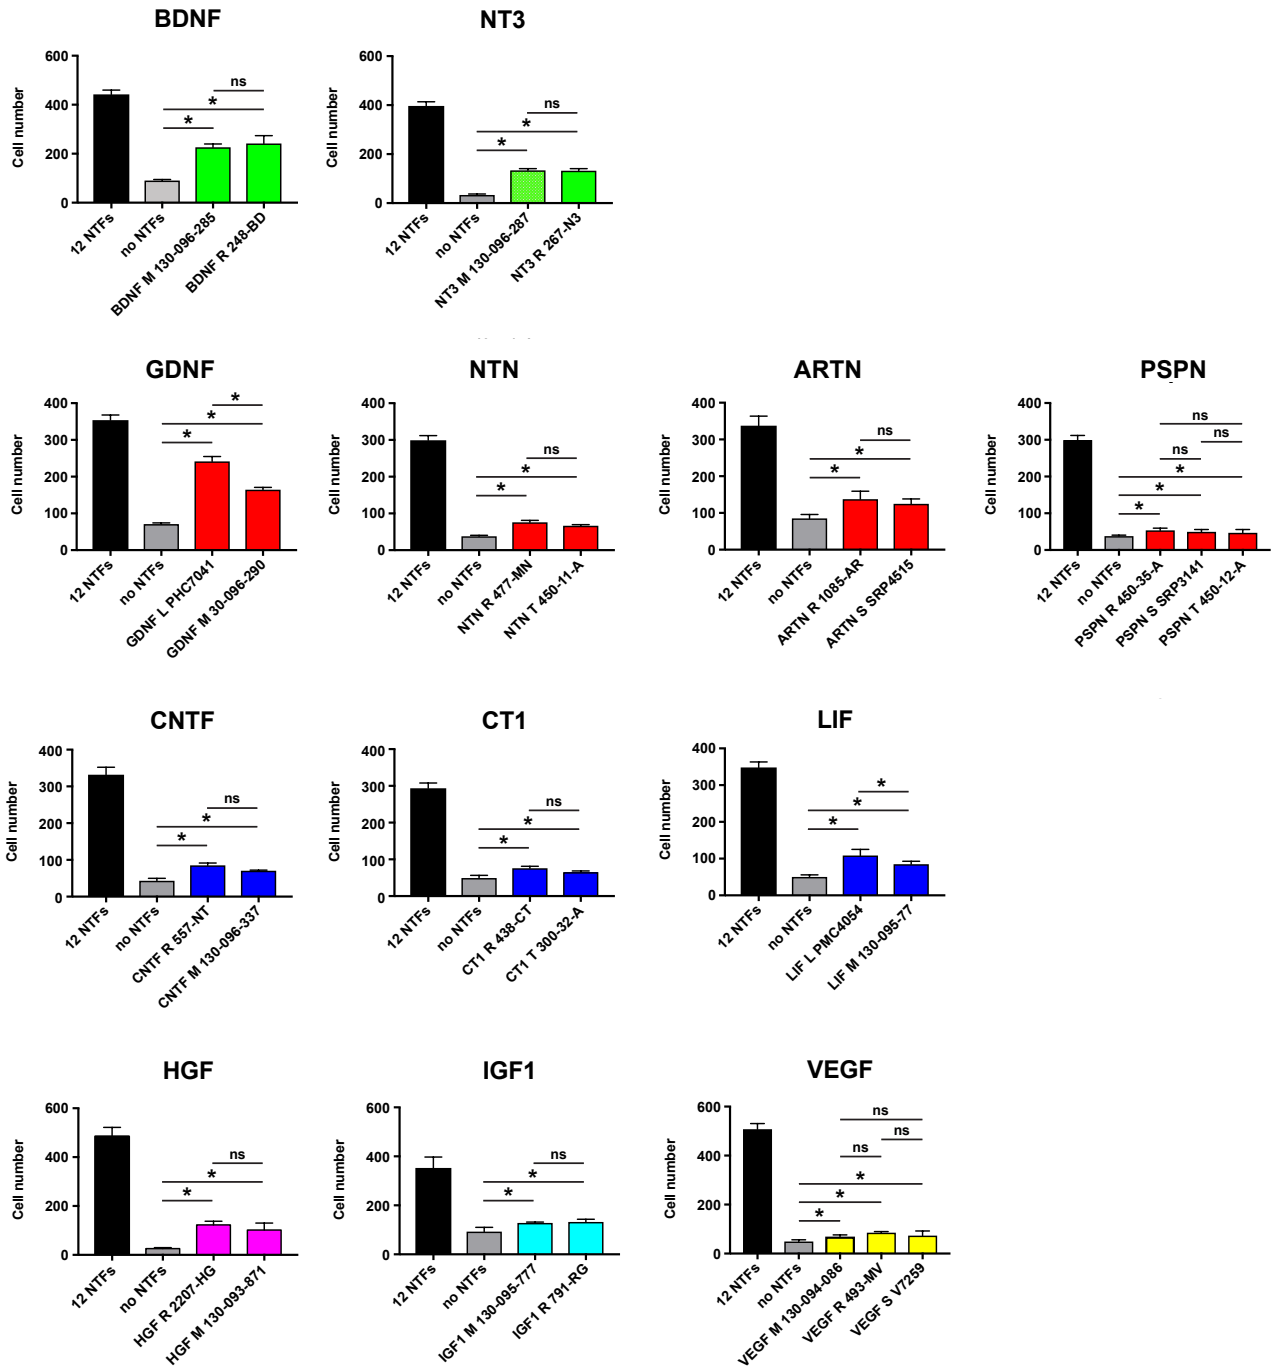

**B Survival kinetics of lumbar MNs**

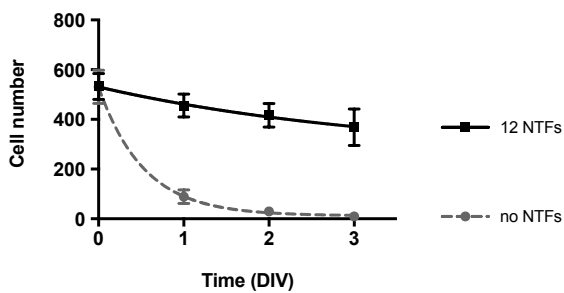

**Supplemental Figure S2. Biological activity of neurotrophic factors on motor neuron survival.**

**A.** Full biological activity of all 12 neurotrophic factors (NTFs) was verified by comparing side by side the effects of different commercial batches purchased from Life Technologies (L), Miltenyi (M), R&D Systems/Bio-Techne (R), Sigma (S) and Tebu (T). NTFs were prepared according to the supplier's recommendations and diluted to their reported optimal concentration (Table 4) in chemically defined medium. Motor neurons (MN) were isolated by high speed FACS from mouse lumbar spinal cord, automatically seeded into 96-well cell culture dishes, and cultured in the presence of a single NTF, all 12 NTFs or no NTFs. Analysis of motor neuron cell survival (mean  $\pm$  sd) at 3 DIV revealed significant biological activity of single NTFs in comparison to no NTFs. NTFs from different suppliers had similar biological activities, except batches of GDNF and LIF. Statistical significance was tested by Kruskal-Wallis test and Tukey post hoc test, n = 6 wells per condition : \* p < 0.01 ; ns: not significant.

**B.** Survival kinetics of lumbar motor neurons (mean  $\pm$  sd) cultured for up to 3 DIV in the presence or absence of 12 NTFs. Data were fitted by the non-linear least-squares method (GraphPad Prism) using a one phase exponential decay equation.

**A Plate design**

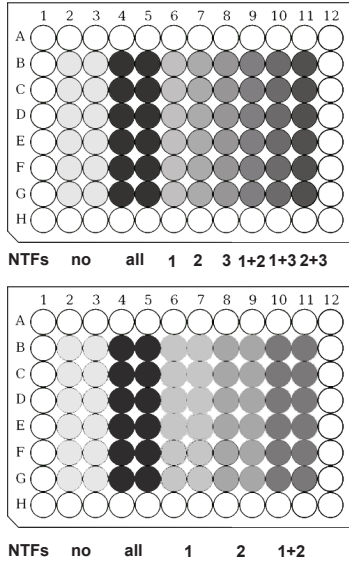

**B Flow chart**

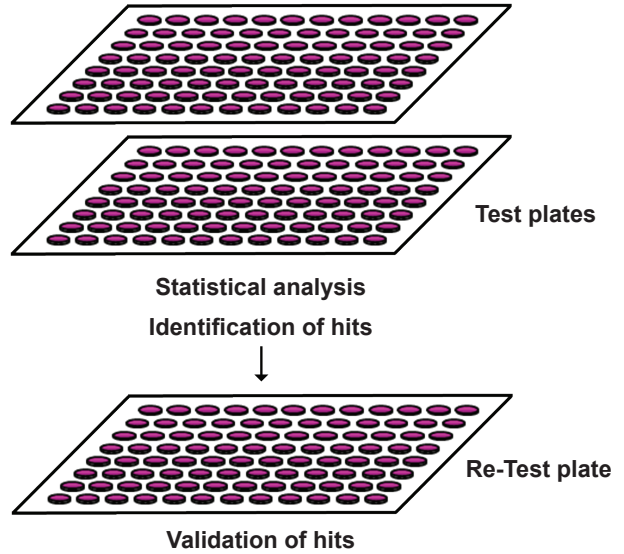

**C NTF assay (mean data)**

| % Survival NTF |      | % Survival NTF combination |      |      |      |      |      |      |      |      |      |     |     |  |
|----------------|------|----------------------------|------|------|------|------|------|------|------|------|------|-----|-----|--|
| GDNF           | 40,3 |                            |      |      |      |      |      |      |      |      |      |     |     |  |
| BDNF           | 25,0 | 64,4                       |      |      |      |      |      |      |      |      |      |     |     |  |
| HGF            | 21,8 | 61,7                       | 50,6 |      |      |      |      |      |      |      |      |     |     |  |
| NTN            | 21,0 | 56,9                       | 35,6 | 33,1 |      |      |      |      |      |      |      |     |     |  |
| NT3            | 12,5 | 53,9                       | 32,8 | 19,0 | 18,1 |      |      |      |      |      |      |     |     |  |
| ARTN           | 10,3 | 49,0                       | 44,6 | 40,0 | 16,6 | 12,2 |      |      |      |      |      |     |     |  |
| LIF            | 8,0  | 50,4                       | 30,5 | 28,7 | 29,1 | 27,2 | 24,3 |      |      |      |      |     |     |  |
| IGF1           | 7,9  | 46,0                       | 29,3 | 35,2 | 37,4 | 19,2 | 10,9 | 20,5 |      |      |      |     |     |  |
| CNTF           | 7,8  | 49,6                       | 34,4 | 35,9 | 25,1 | 21,5 | 21,7 | 10,7 | 10,9 |      |      |     |     |  |
| VEGF           | 6,7  | 45,6                       | 37,2 | 31,0 | 30,4 | 9,0  | 12,6 | 20,0 | 12,0 | 12,0 |      |     |     |  |
| PSP            | 4,8  | 37,5                       | 35,7 | 20,8 | 17,2 | 18,6 | 8,6  | 4,6  | 11,9 | 14,9 | 10,2 |     |     |  |
| CT1            | 2,0  | 35,0                       | 35,3 | 18,0 | 24,3 | 13,2 | 8,9  | 10,1 | 9,1  | 4,5  | 5,0  | 4,5 |     |  |
|                |      | 40,3                       | 25,0 | 21,8 | 21,0 | 12,5 | 10,3 | 8,0  | 7,9  | 7,8  | 6,7  | 4,8 | 2,0 |  |
|                |      | GDNF                       | BDNF | HGF  | NTN  | NT3  | ARTN | LIF  | IGF1 | CNTF | VEGF | PSP | CT1 |  |

**D NTF assay (median data)**

| % Survival NTF |      | % Survival NTF combination |      |      |      |      |      |      |      |      |      |     |     |  |
|----------------|------|----------------------------|------|------|------|------|------|------|------|------|------|-----|-----|--|
| GDNF           | 43,0 |                            |      |      |      |      |      |      |      |      |      |     |     |  |
| BDNF           | 23,2 | 58,1                       |      |      |      |      |      |      |      |      |      |     |     |  |
| HGF            | 20,6 | 62,2                       | 49,6 |      |      |      |      |      |      |      |      |     |     |  |
| NTN            | 20,1 | 56,7                       | 37,2 | 34,0 |      |      |      |      |      |      |      |     |     |  |
| NT3            | 12,2 | 52,3                       | 31,1 | 14,1 | 17,2 |      |      |      |      |      |      |     |     |  |
| ARTN           | 11,7 | 45,6                       | 41,8 | 41,3 | 14,3 | 11,9 |      |      |      |      |      |     |     |  |
| LIF            | 7,0  | 46,3                       | 31,2 | 31,7 | 28,4 | 30,6 | 24,7 |      |      |      |      |     |     |  |
| IGF1           | 7,0  | 46,5                       | 29,0 | 34,6 | 34,6 | 19,6 | 10,7 | 19,6 |      |      |      |     |     |  |
| CNTF           | 6,9  | 50,3                       | 35,4 | 37,6 | 26,6 | 21,6 | 25,3 | 13,3 | 10,8 |      |      |     |     |  |
| VEGF           | 5,4  | 44,5                       | 35,4 | 31,6 | 33,8 | 9,2  | 10,7 | 20,4 | 10,4 | 12,4 |      |     |     |  |
| PSP            | 4,4  | 35,9                       | 35,6 | 21,3 | 19,1 | 17,9 | 10,9 | 4,2  | 8,3  | 12,9 | 13,7 |     |     |  |
| CT1            | 3,7  | 34,8                       | 35,0 | 18,0 | 29,9 | 13,4 | 8,1  | 10,7 | 10,8 | 7,4  | 4,1  | 4,9 |     |  |
|                |      | 43,0                       | 23,2 | 20,6 | 20,1 | 12,2 | 11,7 | 7,0  | 7,0  | 6,9  | 5,4  | 4,4 | 3,7 |  |
|                |      | GDNF                       | BDNF | HGF  | NTN  | NT3  | ARTN | LIF  | IGF1 | CNTF | VEGF | PSP | CT1 |  |

**E NTF assay (range of data)**

| % Survival NTF |             | % Survival NTF combination |             |             |             |             |             |             |             |             |             |           |           |  |
|----------------|-------------|----------------------------|-------------|-------------|-------------|-------------|-------------|-------------|-------------|-------------|-------------|-----------|-----------|--|
| GDNF           | 33,6 - 47,6 |                            |             |             |             |             |             |             |             |             |             |           |           |  |
| BDNF           | 17,0 - 30,7 | 55,9 - 61,6                |             |             |             |             |             |             |             |             |             |           |           |  |
| HGF            | 12,4 - 30,9 | 61,6 - 68,6                | 47,4 - 58,0 |             |             |             |             |             |             |             |             |           |           |  |
| NTN            | 13,8 - 27,6 | 51,7 - 60,4                | 29,0 - 41,9 | 32,2 - 34,4 |             |             |             |             |             |             |             |           |           |  |
| NT3            | 7,8 - 17,3  | 50,8 - 56,8                | 28,2 - 38,4 | 11,3 - 26,2 | 14,8 - 21,6 |             |             |             |             |             |             |           |           |  |
| ARTN           | 9,0 - 16,1  | 44,3 - 56,8                | 39,6 - 51,9 | 38,9 - 43,1 | 8,5 - 22,5  | 7,7 - 12,1  |             |             |             |             |             |           |           |  |
| LIF            | 3,6 - 10,7  | 43,6 - 51,9                | 28,0 - 32,4 | 28,2 - 35,2 | 26,3 - 32,6 | 25,3 - 32,0 | 23,2 - 26,1 |             |             |             |             |           |           |  |
| IGF1           | 3,8 - 8,9   | 41,4 - 51,5                | 28,4 - 29,9 | 30,1 - 39,9 | 32,2 - 40,4 | 17,6 - 24,7 | 7,4 - 14,0  | 18,8 - 22,2 |             |             |             |           |           |  |
| CNTF           | 1,6 - 11,5  | 45,6 - 52,4                | 32,8 - 40,1 | 30,7 - 43,6 | 21,4 - 28,2 | 16,1 - 26,3 | 24,3 - 26,3 | 9,4 - 17,1  | 10,1 - 12,1 |             |             |           |           |  |
| VEGF           | 1,7 - 11,8  | 38,1 - 52,0                | 27,8 - 43,6 | 23,0 - 36,8 | 23,2 - 35,7 | 8,8 - 10,4  | 4,6 - 14,5  | 15,3 - 22,1 | 10,4 - 15,4 | 10,3 - 15,9 |             |           |           |  |
| PSP            | 2,1 - 9,3   | 28,7 - 44,4                | 24,2 - 40,9 | 17,8 - 23,3 | 14,2 - 20,9 | 12,7 - 22,4 | 5,8 - 12,6  | 0,6 - 5,0   | 7,8 - 17,2  | 9,1 - 20,1  | 2,9 - 16,8  |           |           |  |
| CT1            | 0,1 - 7,4   | 31,4 - 41,9                | 34,9 - 38,4 | 17,2 - 18,9 | 26,9 - 34,7 | 12,4 - 15,2 | 2,3 - 14,4  | 7,9 - 13,4  | 4,8 - 13,5  | 1,3 - 8,2   | -3,3 - 15,5 | 4,0 - 5,0 |           |  |
|                |             | 33,6 - 47,6                | 17,0 - 30,7 | 12,4 - 30,9 | 13,8 - 27,6 | 7,8 - 17,3  | 9,0 - 16,1  | 3,5 - 10,7  | 3,8 - 8,9   | 2,6 - 11,5  | 1,7 - 11,8  | 2,1 - 9,3 | 0,1 - 7,4 |  |
|                |             | GDNF                       | BDNF        | HGF         | NTN         | NT3         | ARTN        | LIF         | IGF1        | CNTF        | VEGF        | PSP       | CT1       |  |

**Supplemental Figure S3. Screening NTF combinations.**

- A.** Design of test and re-test plates. 96-well test plates (upper panel) contain rows with negative controls (culture medium only), positive controls (all 12 NTFs in culture medium), three individual NTFs (1, 2, 3) and all three pairwise NTF combinations (1+2, 1+3, 2+3). Re-test plates (lower panel) are used to confirm the effects of two NTFs in combination. Plates are prepared prior to FACS by manual pipetting of culture medium (135  $\mu$ l) and addition of NTFs or NTF combinations (15  $\mu$ l) at 10-fold final concentration in culture medium. Wells on the edges are filled with water.
- B.** Flow chart for data analysis and processing, ref. (1). Statistical differences between conditions on each plate are tested by Kruskal Wallis test and Dunn's post hoc test.
- C.** NTF assay showing mean values of motor neuron survival. Survival data are expressed relative to no NTFs (set 0%) and all 12 NTFs (set 100%).
- D.** NTF assay showing median values of motor neuron survival.
- E.** NTF assay showing range of data (25% - 75% percentiles).

**A Marker gene expression in motor neuron subsets**

| Gene    | Synonyme   | GSM         | Fold change LMC/PGC vs MMC |          |       |       |        | p-value | MN marker |
|---------|------------|-------------|----------------------------|----------|-------|-------|--------|---------|-----------|
|         |            |             | mean                       | sd       | #1    | #2    | #3     |         |           |
| Pou3f1  | Oct6, Scip | GSMG0027043 | -2,78                      | 0,274287 | -2,62 | -2,63 | -3,1   | 9.41E-4 | MMC       |
| Lhx3    |            | GSMG0022555 | -9,73                      | 2,046485 | -9,22 | -8,21 | -12,15 | 2.95E-4 | MMC       |
| Lhx4    |            | GSMG0002258 | -4,89                      | 0,228108 | -8,21 | -8,61 | -8,22  | 2.71E-3 | MMC       |
| Aldh1a2 | Raldh2     | GSMG0039772 | 24,25                      | 5,461734 | 18,6  | 26,3  | 29,16  | 1.1E-3  | LMC       |
| Lhx1    |            | GSMG0007133 | 5,6                        | 0,653682 | 6,31  | 5,01  | 5,54   | 1.2E-3  | LMC       |
| Foxp1   | FoxP1      | GSMG0033453 | 2,18                       | 0,542248 | 2,82  | 2,06  | 1,77   | 3.67E-2 | LMC/PGC   |
| Nos1    | nNos       | GSMG0029706 | 3,26                       | 0,40129  | 3,5   | 3,51  | 2,81   | 4.51E-3 | PGC       |
| Hnf6    | Onecut1    | GSMG0039805 | 3,68                       | 0,633798 | 4,31  | 3,8   | 3,05   | 7.56E-4 | PGC       |
| Smad1   |            | GSMG0038636 | 1,36                       | 0,091652 | 1,34  | 1,46  | 1,28   | 3.11E-3 | PGC       |

**B Global gene expression analysis in FACS-isolated motor neuron subsets**

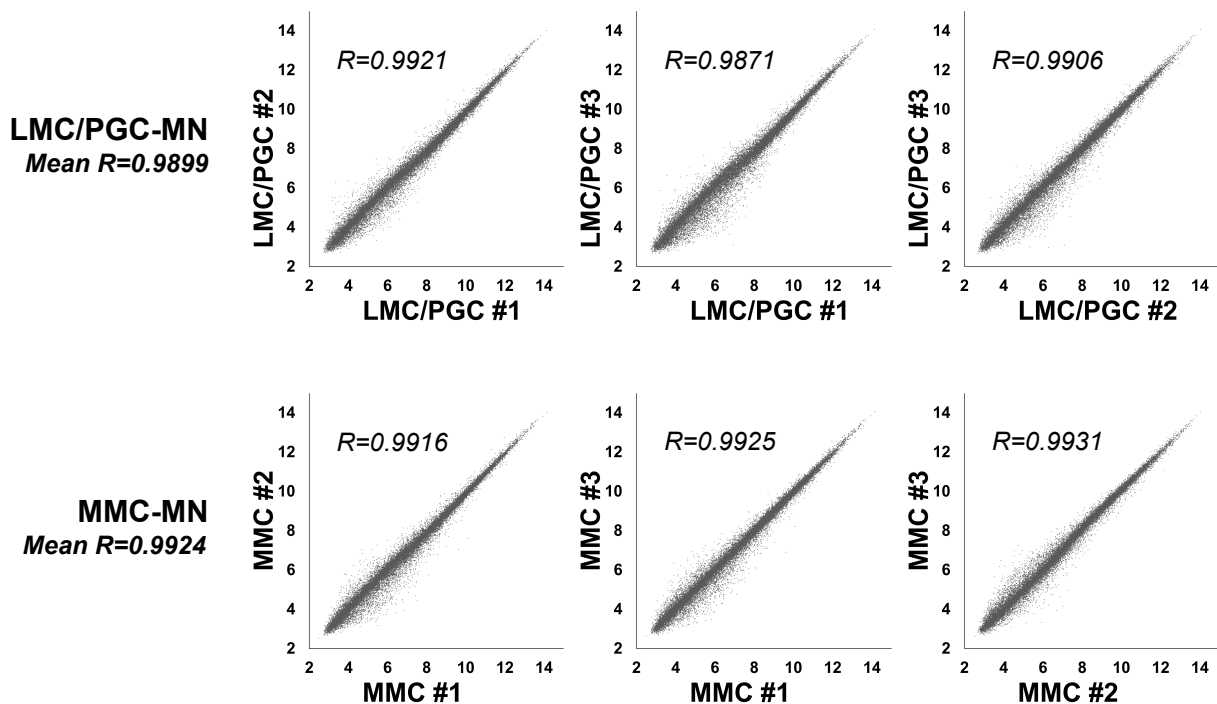

**Supplemental Figure S4. Gene expression profiles of LMC/PGC motor neurons and MMC motor neurons on microarrays.**

**A.** Gene expression profile of marker genes in LMC/PGC-MN and MMC-MN. Fold changes (mean, sd, sample pairs #1, #2, #3) and p-values by student's t-test are indicated.

**B.** Global gene expression analysis in FACS-isolated motor neuron subsets. Scatter plots and correlation coefficients of gene expression ( $R$ ) between independent biological replicates #1, #2 and #3 of LMC/PGC-MN and MMC-MN show high standardization. Expression values are on log<sub>2</sub> scale.

**A Survival kinetics of motor neuron subsets**

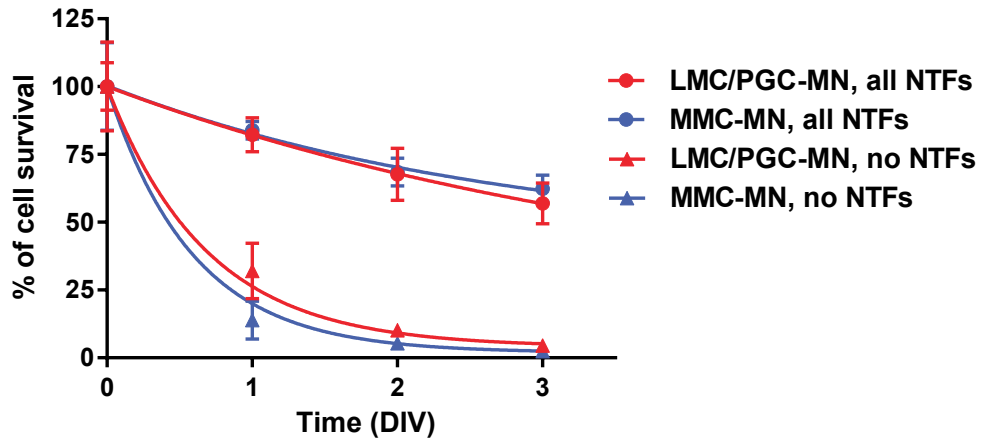

**B Neurotrophic factor effects on motor neuron subsets**

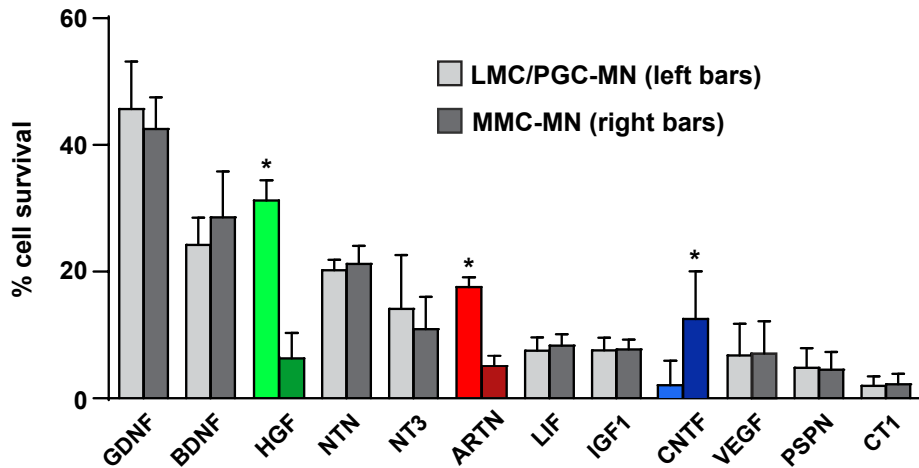

**Supplemental Figure S5. Gene expression profile and NTF survival responses of LMC/PGC and MMC motor neurons.**

**a.** Similar survival kinetics (mean  $\pm$  sd) of FACS-isolated LMC/PGC-MN and MMC-MN from 0 to 3 DIV. There are no significant survival differences between LMC/PGC-MN and MMC-MN cultured in the presence or absence of NTFs. The kinetic data were fitted by a non-linear least-squares method (GraphPad Prism) using a one phase exponential decay equation.

**b.** Similar survival responses of LMC/PGC-MN (light shaded bars) and MMC-MN (dark shaded bars) to the neurotrophic factors CNTF, BDNF, NTN, LIF, IGF1, VEGF, PSPN and CT1. Distinct survival responses are seen for HGF, ARTN and CNTF (mean  $\pm$  sd, \*  $p < 0.05$ , Mann & Whitney test). Survival values are expressed relative to the value obtained in the presence of all NTFs (100 %) or no NTF (0 %).



Artemin survival signaling

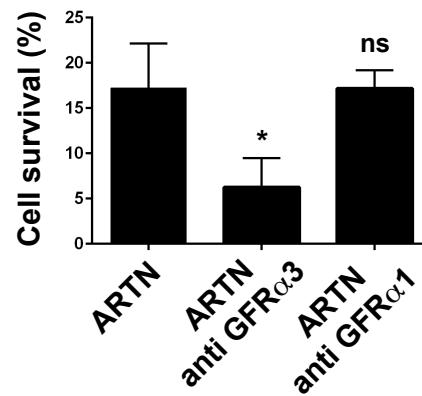

**Supplemental Figure S6. GFR $\alpha$ 3-mediated Artemin survival signaling.**

Cell survival of motor neurons cultured in the presence of Artemin (ARTN) is significantly inhibited by pre-incubation with antibodies against the extracellular domain of GFR $\alpha$ 3 (2  $\mu$ g/ml, 1 h) but not with antibodies against GFR $\alpha$ 1 (10  $\mu$ g/ml, 1 h). \*,  $p = 3.28 \text{ E-}7$  by student's t-test; ns: not significant.

## Supplemental Materials and Methods

**Reagents.** Antibodies, neurotrophic factors, pharmacological inhibitors and antisense probes are listed in **Tables 1-6**. Other reagents (references, suppliers) were as follows: DIG-labeling kits, yeast RNA and RNase (Roche), bovine serum albumin (BSA), DNase I (DN25), trypsin, bovine hemoglobin (H2625-25G), poly-DL-ornithin (P8638) (Sigma), L15 (11415-064), B27 (17504-044), Neurobasal without riboflavin (041-96399M) (Thermofisher), laminin (354232, Corning), calcein (FP-855422, Interchim), Triton X-100 (Euromedex), Facsflow (342003), Facsrinse (340346) (Becton Dickinson), 24-well plates (142475, Nunc), 96-well plates (655090, Greiner or 353219, Falcon) and 384-well plates (781091, Greiner).

**Gene expression profiling.** FACS-isolated motor neurons were collected at a minimum yield of 60.000 cells per subtype in each of three replicate experiments. RIN values were between 8.1 and 9.5 (mean 8.9). Gene expression profiling was performed using Mouse Exon 1.0 ST arrays (Affymetrix, Hygh Wycombe, UK) according to the supplier's recommendations. Raw data were controlled with Expression console (Affymetrix) and analyzed by GenoSplice using EASANA software and FAST DB annotations (2).

**Immunoblot analyses.** FACS-isolated motor neurons were collected in ice-cold Laemmli buffer, protein extracts corresponding to 20.000 motor neurons separated by SDS-PAGE and blotted on membranes. Membranes were reacted with antibodies (**Table 3**) and revealed with a ChemiDoc XRS+ imager (Biorad).

**Immunohistochemistry.** Transverse sections of E12 mouse embryos were incubated with primary antibodies and biotinylated or fluorochrome-conjugated secondary reagents (**Table 1**). Slides were mounted with Vectashield/DAPI and images acquired with an inverted Leica DMI 4000B microscope or a Zeiss LSM510 confocal microscope.

**Retrograde labeling.** Urogenital organs including bladder (3) of E12 Hb9:GFP embryos were identified using a fluorescence dissection microscope (Leica FZ III). Injection of Dextran conjugated to AlexaFluor or Tetramethylrhodamine were performed using a microcapillary. Embryos were incubated for 3 to 4 hours at 30°C in Hibernate medium containing 1% penicillin-streptomycin under continuous CO<sub>2</sub>/O<sub>2</sub> bubbling. Embryos were then either processed for immunohistochemistry or their spinal cords were dissected out. Preparation of single cell suspensions and flow cytometry analysis were done as described above.

**Signaling studies.** Pharmacological inhibitors are listed in **Table 5**. The monovalent antibody against mouse c-Met (OA-118) was designed, produced and tested for its biological activity as described (4). Unless otherwise stated, FACS-isolated motor neurons were pre-incubated with the inhibitors for 1 h before NTF addition. Optimal concentrations of each inhibitor were empirically determined.

**Whole mount labelings.** E12 spinal cords were reacted with digoxigenin (DIG)-labelled RNA probes (**Table 6**) or anti-GFR $\alpha$ 3 antibodies. In situ hybridization and in situ immunohistochemistry were performed by standard techniques (5) and images acquired with a Leica MZ 12 microscope.

## Tables

**Table 1. Antibodies used in immunohistochemistry**

| Primary Antibodies                               | Dilution | Supplier        | Reference |
|--------------------------------------------------|----------|-----------------|-----------|
| Choline Acetyl Transferase (goat)                | 1:100    | Chemicon        | Ab144P    |
| Engrailed 1 (EN1) (mouse)                        | 1:20     | DSHB            | 4G11      |
| CHX10 (sheep)                                    | 1:50     | Exalpha         | X1179P    |
| GFR $\alpha$ 3 (goat)                            | 1:500    | R&D Systems     | AF2645    |
| Neurofilament M (rabbit)                         | 1:1000   | Merck Millipore | AB1987    |
| Neurofilament H non phosphorylated SMI32 (mouse) | 1:500    | Sternberger     | SMI-32R   |
| nNOS C-ter (rabbit)                              | 1:300    | Immunostar      | 24287     |
| Fox P1 (rabbit)                                  | 1:500    | Abcam           | ab16645   |

  

| Secondary antibodies and tracers | Dilution | Supplier     | Reference   |
|----------------------------------|----------|--------------|-------------|
| anti-goat Biotin (donkey)        | 1:500    | Jackson Lab. | 705-066-147 |
| Streptavidin Alexa Fluor 594     | 1:500    | Invitrogen   | S32356      |
| anti-rabbit Cy5 (donkey)         | 1:300    | Jackson Lab. | 711-175-152 |
| anti-mouse Cy5 (donkey)          | 1:200    | Jackson Lab. | 711-175-151 |
| anti-sheep Cy3 (donkey)          | 1:200    | Jackson Lab. | 713-165-147 |
| Dextran Alexa 647                | 50 mg/ml | Invitrogen   | D22914      |
| Dextran Tetramethylrodamine      | 50 mg/ml | Invitrogen   | D1817       |

**Table 2. Antibodies used in flow cytometry**

| Primary Antibodies        | Dilution | Supplier   | Reference          |
|---------------------------|----------|------------|--------------------|
| Hb9 (mouse)               | 1:100    | DSHB       | 81.5C10            |
| Islet-1 / Islet-2 (mouse) | 1:100    | DSHB       | 40.2D6 /<br>39.4D5 |
| Lhx 1/2 (mouse)           | 1:100    | DSHB       | 4F2                |
| Lhx 3 (mouse)             | 1:100    | DSHB       | 67.4E12            |
| Foxp1 (mouse)             | 1:2000   | Abcam      | ab32010            |
| Oct6 (mouse)              | 1:2000   | S. Driegen | (6)                |

  

| Secondary Antibodies                     | Dilution | Supplier   | Reference |
|------------------------------------------|----------|------------|-----------|
| anti-mouse IgG Alexa Fluor 568 (donkey)  | 1:1000   | Invitrogen | A10037    |
| anti-rabbit IgG Alexa Fluor 568 (donkey) | 1:1000   | Invitrogen | A10042    |
| anti-mouse IgG Alexa Fluor 633 (goat)    | 1:2000   | Invitrogen | A21052    |
| anti-rabbit IgG Alexa Fluor 633 (goat)   | 1:2000   | Invitrogen | A21070    |
| anti-sheep IgG (donkey)                  | 1:2000   | Invitrogen | A21099    |

**Table 3. Antibodies used in immunoblots**

| Primary Antibodies    | Dilution | Supplier       | Reference |
|-----------------------|----------|----------------|-----------|
| c-Met (mouse)         | 1:1000   | Cell Signaling | 3127      |
| c-Ret (C-19) (rabbit) | 1:200    | Santa Cruz     | sc-167    |

|                                |       |                 |          |
|--------------------------------|-------|-----------------|----------|
| GFR $\alpha$ 3 (goat)          | 1:100 | R&D Systems     | AF2645   |
| Gp130 (C-20) (rabbit)          | 1:100 | Santa Cruz      | sc-655   |
| H3 (mouse)                     | 1:200 | Merck Millipore | 05-499   |
| LIF R $\beta$ (H-220) (rabbit) | 1:100 | Santa Cruz      | sc-20752 |
| Syndecan-3 (rabbit)            | 1:500 | Abcam           | Ab63932  |

| <b>Secondary Antibodies</b> | <b>Dilution</b> | <b>Supplier</b> | <b>Reference</b> |
|-----------------------------|-----------------|-----------------|------------------|
| HRP - anti-rabbit (goat)    | 1:40.000        | Invitrogen      | 62-6120          |
| HRP - anti-goat (donkey)    | 1:40.000        | Jackson Lab.    | 705-036-147      |
| HRP - anti-mouse (goat)     | 1:40.000        | Jackson Lab.    | 115-036-062      |
| HRP - anti-rabbit (goat)    | 1:40.000        | Jackson Lab.    | 111-036-045      |
| HRP - anti-rabbit (goat)    | 1:40.000        | Jackson Lab.    | 111-035-144      |

**Table 4. Neurotrophic factors**

| <b>Neurotrophic factor</b> | <b>Final concentration (ng/ml)</b> | <b>Supplier</b>   | <b>Reference</b> |
|----------------------------|------------------------------------|-------------------|------------------|
| ARTN                       | 10                                 | R&D Systems       | 1085-AR          |
| BDNF                       | 1                                  | R&D Systems       | 248-BD           |
| CNTF                       | 10                                 | R&D Systems       | 557-NT           |
| CT1                        | 10                                 | R&D Systems       | 438-CT           |
| GDNF                       | 1                                  | Life Technologies | PHC7041          |
| HGF                        | 2                                  | R&D Systems       | 2207-HG          |
| IGF1                       | 100                                | R&D Systems       | 791-MG           |
| LIF                        | 10                                 | Life Technologies | PMC4054          |
| NT3                        | 10                                 | R&D Systems       | 267-N3           |
| NTN                        | 10                                 | R&D Systems       | 477-MN           |
| PSPN                       | 10                                 | R&D Systems       | 2479-PS          |
| VEGF                       | 100                                | R&D Systems       | 493-MV           |

**Table 5. Pharmacological inhibitors**

| <b>Inhibitor</b>    | <b>Conc. / Dilution</b> | <b>Supplier</b> | <b>Reference</b> |
|---------------------|-------------------------|-----------------|------------------|
| EMD 1204831         | 100 nM                  | Merck           | (7)              |
| OA-118              | 5 $\mu$ g/ml            | Genentech       | (4)              |
| Heparinase III      | 1:10.000                | R&D Systems     | 6145-GH          |
| PI-PLC              | 2 $\mu$ g/ml            | Sigma-Aldrich   | P8804            |
| anti-GFR $\alpha$ 1 | 10 $\mu$ g/ml           | R&D Systems     | AF560            |
| anti-GFR $\alpha$ 3 | 2 $\mu$ g/ml            | R&D Systems     | AF2645           |

**Table 6. Antisense probes used for in situ hybridization**

| <b>Probe</b> | <b>Restriction Enzyme/<br/>RNA Polymerase</b> | <b>Origin</b> | <b>Reference</b> |
|--------------|-----------------------------------------------|---------------|------------------|
| Met 5'       | BamHI/T3                                      | Y. Yamamoto   | (8)              |
| Met 3'       | NotI/T3                                       | Y. Yamamoto   | (8)              |
| Ret          | NotI/T7                                       | V. Pachnis    | (9)              |
| Gfra3        | BamHI/T3                                      | P. Ernfors    | (10)             |
| Hb9          | EcoRV/T7                                      | J. Livet      | unpublished      |
| Lifrb        | EcoRI/T3                                      | H. Nishimune  | (11)             |
| Raldh2       | XbaI/T7                                       | T. Jessell    | (12)             |

## Supplemental References

1. Malo N, Hanley JA, Cerquozzi S, Pelletier J, & Nadon R (2006) Statistical practice in high throughput screening data analysis. *Nature Biotechnology* 24(2):167-175.
2. de la Grange P, Dutertre M, Correa M, & Auboeuf D (2007) A new advance in alternative splicing databases: from catalogue to detailed analysis of regulation of expression and function of human alternative splicing variants. *BMC Bioinformatics* 8:180.
3. Islam SS, et al. (2013) Spatio-temporal distribution of Smads and role of Smads/TGF-beta/BMP-4 in the regulation of mouse bladder organogenesis. *PLoS One* 8(4):e61340.
4. Merchant M, et al. (2013) Monovalent antibody design and mechanism of action of onartuzumab, a MET antagonist with anti-tumor activity as a therapeutic agent. *Proc Natl Acad Sci U S A* 110(32):E2987-2996.
5. Haase G, et al. (2002) GDNF acts through PEA3 to regulate cell body positioning and muscle innervation of specific motor neuron pools. *Neuron* 35(5):893-905.
6. Jagalur NB, et al. (2011) Functional dissection of the Oct6 Schwann cell enhancer reveals an essential role for dimeric Sox10 binding. *Journal of Neuroscience* 31(23):8585-8594.
7. Bladt F, et al. (2013) EMD 1213063 and EMD 1204831 constitute a new class of potent and highly selective c-Met inhibitors. *Clin Cancer Res* 19:2941-2951.
8. Yamamoto Y, et al. (1997) Hepatocyte growth factor (HGF/SF) is a muscle-derived survival factor for a subpopulation of embryonic motoneurons. *Development* 124(15):2903-2913.
9. Pachnis V, Mankoo B, & Costantini F (1993) Expression of the c-ret proto-oncogene during mouse embryogenesis. *Development* 119(4):1005-1017.
10. Naveilhan P, et al. (1998) Expression and regulation of GFRalpha3, a glial cell line-derived neurotrophic factor family receptor. *Proc Natl Acad Sci U S A* 95(3):1295-1300.
11. Nishimune H, et al. (2000) Reg-2 is a motoneuron neurotrophic factor and a signalling intermediate in the CNTF survival pathway. *Nat Cell Biol* 2(12):906-914.
12. Sockanathan S, Perlmann T, & Jessell TM (2003) Retinoid receptor signaling in postmitotic motor neurons regulates rostrocaudal positional identity and axonal projection pattern. *Neuron* 40(1):97-111.
